# Supplementary material
Source: Research Square preprint supplement (doi:10.21203/rs.3.rs-9158234/v1)
Supplement: Supplementary file 1 [file 13227b875840b361b1fb5aac.docx]

**Pre-training Questionnaire (e-learning FAST ultrasound)**

- Please provide your e-learning login ID: ________
- Age: ____ years
- Sex: 1. Male  2. Female
- Highest level of education: 1. Vocational college  2. University  3. Other: ________
- Years of professional experience: ____ years
- Are you a supervising emergency medical technician (EMT)?  1. Yes  2. No
- Approximate number of dispatches per year: ________
- Work schedule on the day before the training: 1. Day shift  2. Night shift  3. Day off
- Prior experience using e-learning: 1. Yes  2. No
- Prior experience using ultrasound: 1. Yes  2. No
- For residents in initial postgraduate training who answered “Yes” to prior ultrasound use: approximately how many scans have you performed and which anatomical regions?

____ scans; regions: ____________________

- Was the e-learning content satisfactory?

1. Yes  2. No

- Did you understand the e-learning lectures?

1. Yes  2. Some parts were not understood

- Was the duration of the e-learning lectures appropriate?

1. A longer duration would have been better  2. Appropriate  3. A shorter duration would have been better

- Was the image quality in the e-learning materials good?

1. Yes  2. No

- What score do you think you will obtain on the pre-test?

____ points

- Approximately what score do you expect to obtain on the pre-test?

____ points

- How confident are you in operating the ultrasound device?

1.Very confident  2. Somewhat confident  3. Neither

4. Not very confident  5. Not confident at all

- How confident are you that you can visualize the required FAST views?

1.Confident  2. Somewhat confident  3. Neither

4. Not very confident  5. Not confident

- How long do you expect it will take to obtain FAST images?

____ minutes ____ seconds.

**Post-training Questionnaire**

- Please provide your e-learning login ID: ________
- How confident did you feel when answering the pre-test?

1.Very confident  2. Somewhat confident  3. Neither

4. Not very confident  5. Not confident at all

- How difficult was the pre-test?  1. Easy  2. Difficult
- How difficult was operating the ultrasound device?

1.Easier than expected  2. Somewhat easy  3. Average

4. Somewhat difficult  5. Difficult

- How difficult was the visualization of organs during the FAST examination?

1.Easier than expected  2. Somewhat easy  3. Average

4. Somewhat difficult  5. Difficult

- Approximately how long did it take to obtain FAST images?

____ minutes ____ seconds.
